# Supplementary material for: Fragmentation landscape of cell-free DNA revealed by deconvolutional analysis of end motifs
Source: PubMed Central journal article supplement — Proc Natl Acad Sci U S A. 2023 Apr 19;120(17):e2220982120. doi: 10.1073/pnas.2220982120 (PMC10151549; doi:10.1073/pnas.2220982120), 2023-04-19
Supplement: pnas.2220982120.sapp.pdf [file pnas.2220982120.sapp.pdf]

## Supplementary Information for

Fragmentation landscape of cell-free DNA revealed by deconvolutional analysis of end motifs

Ze Zhou<sup>a,b,c,1</sup>, Mary-Jane L. Ma<sup>a,b,c,1</sup>, Rebecca W. Y. Chan<sup>a,b,c</sup>, W. K. Jacky Lam<sup>a,b,c,d</sup>, Wenlei Peng<sup>a,b,c</sup>, Wanxia Gai<sup>a,b,c</sup>, Xi Hu<sup>a,b,c</sup>, Spencer C. Ding<sup>a,b,c</sup>, Lu Ji<sup>a,b,c</sup>, Qing Zhou<sup>a,b,c</sup>, Peter P. H. Cheung<sup>b,c</sup>, Stephanie C. Y. Yu<sup>a,b,c</sup>, Jeremy Y. C. Teoh<sup>e</sup>, Cheuk-Chun Szeto<sup>f</sup>, John Wong<sup>e</sup>, Vincent W. S. Wong<sup>f</sup>, Grace L. H. Wong<sup>g</sup>, Stephen L. Chan<sup>d,h</sup>, Edwin P. Hui<sup>d,h</sup>, Brigette B. Y. Ma<sup>d,h</sup>, Anthony T. C. Chan<sup>d,h</sup>, Rossa W. K. Chiu<sup>a,b,c</sup>, K. C. Allen Chan<sup>a,b,c,d</sup>, Y. M. Dennis Lo<sup>a,b,c,d,\*</sup>, and Peiyong Jiang<sup>a,b,c,d,\*</sup>

Y.M. Dennis Lo

Email: loym@cuhk.edu.hk.

Peiyong Jiang

Email: jiangpeiyong@cuhk.edu.hk.

### This PDF file includes:

1. Figure S1 to S5
2. Table S1 to S4

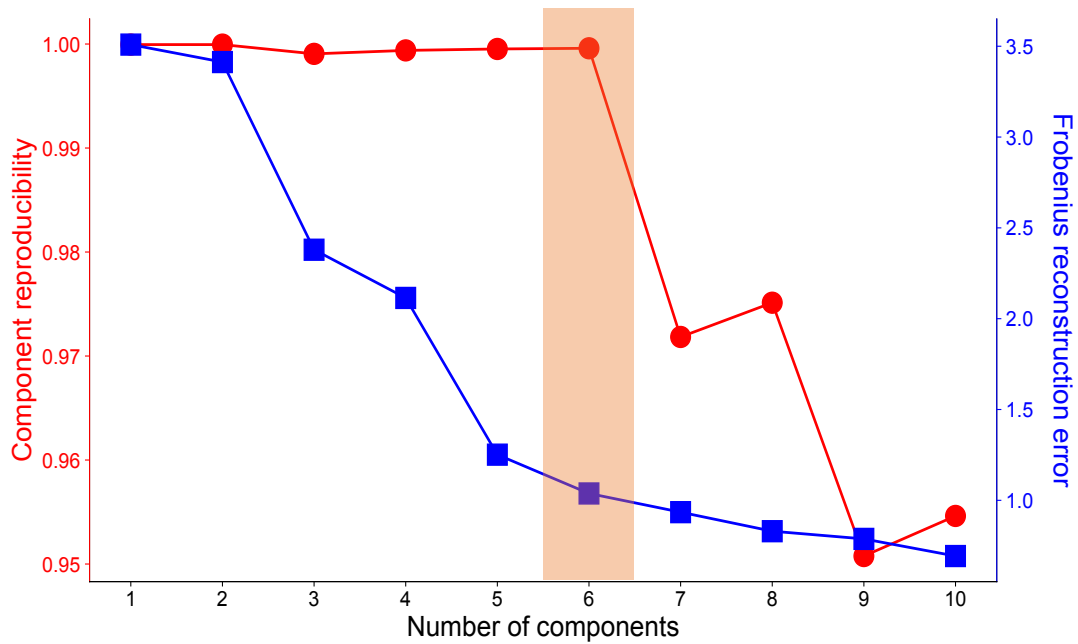

**Fig. S1.** The assessment of the reproducibility and the error according to the different number of F-profiles used in non-negative matrix factorization based on the 5-fold cross validation. The reproducibility was measured by the averaged cosine similarity between every fold in terms of F-profiles. The error was defined as the absolute difference between the observed end-motif profiles and the deduced end-motif profiles based on F-profiles.

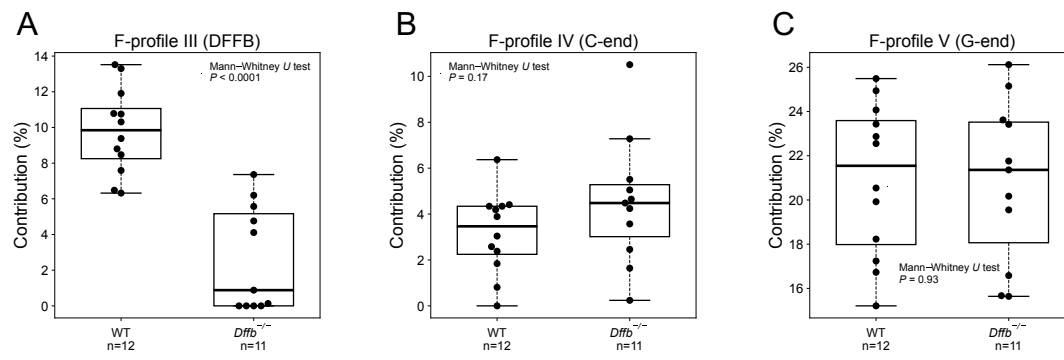

**Fig. S2.** Boxplots of F-profiles (A) III, (B) IV, and (C) V contributions in plasma cfDNA between WT and  $Dffb^{-/-}$  mice.

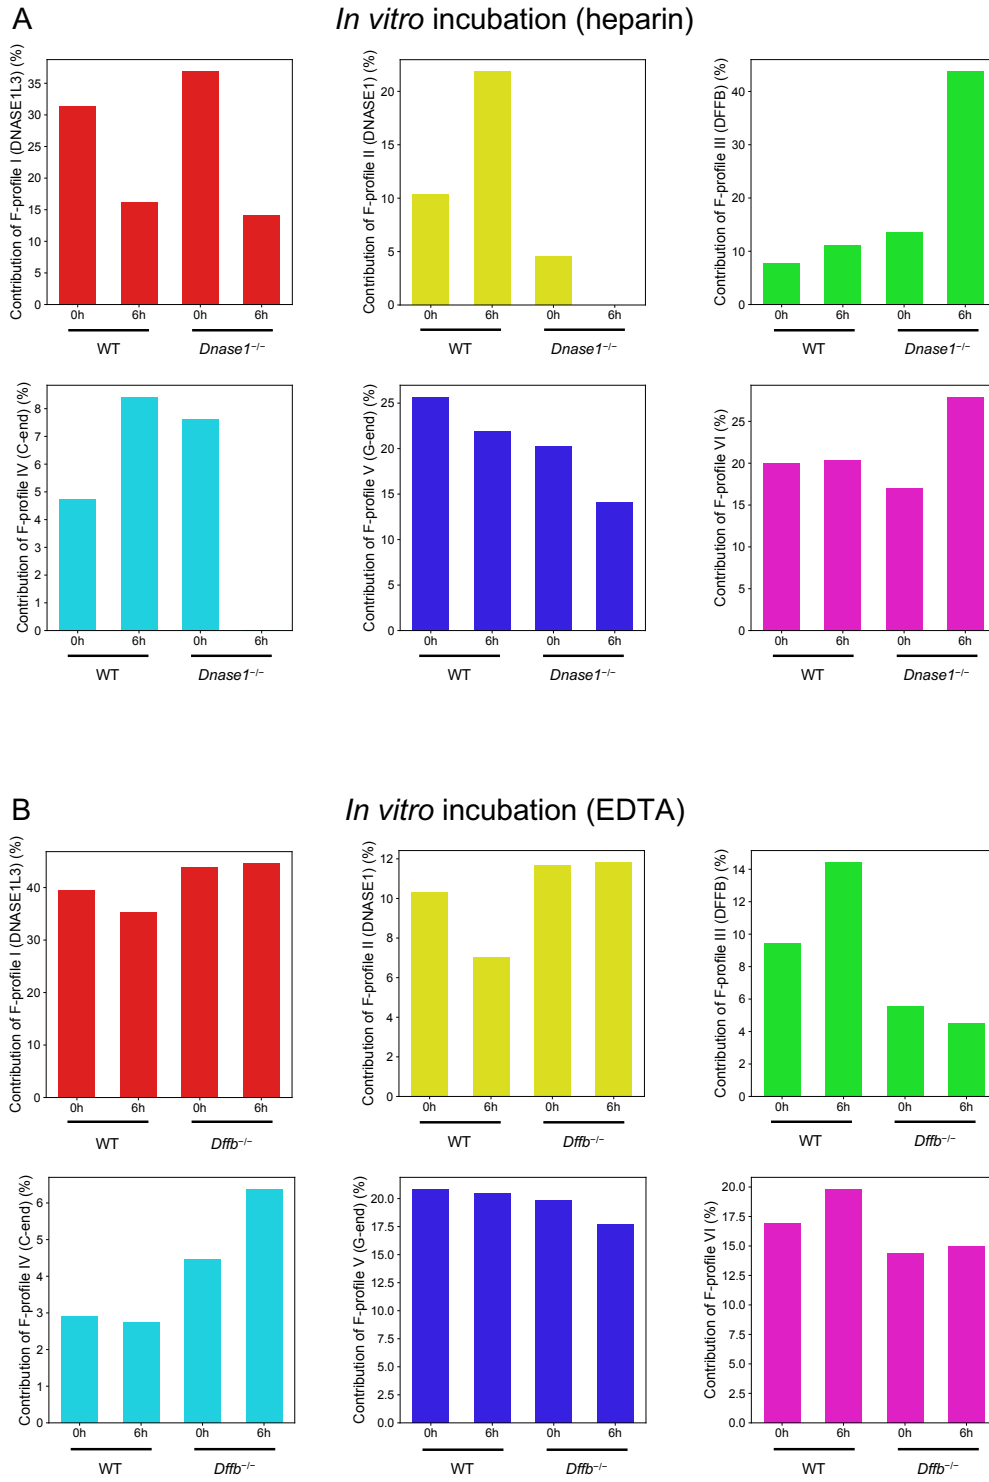

**Fig. S3.** The F-profiles levels in mouse plasma cfDNA samples that were subjected to whole blood *in vitro* incubation. (A) F-profile levels in WT and *Dnase1*<sup>-/-</sup> mice before and after 6h incubation in heparin-contained tube. (B) F-profile levels in plasma cfDNA of WT and *Dffb*<sup>-/-</sup> mice before incubation and after 6h incubation in EDTA-contained tube.

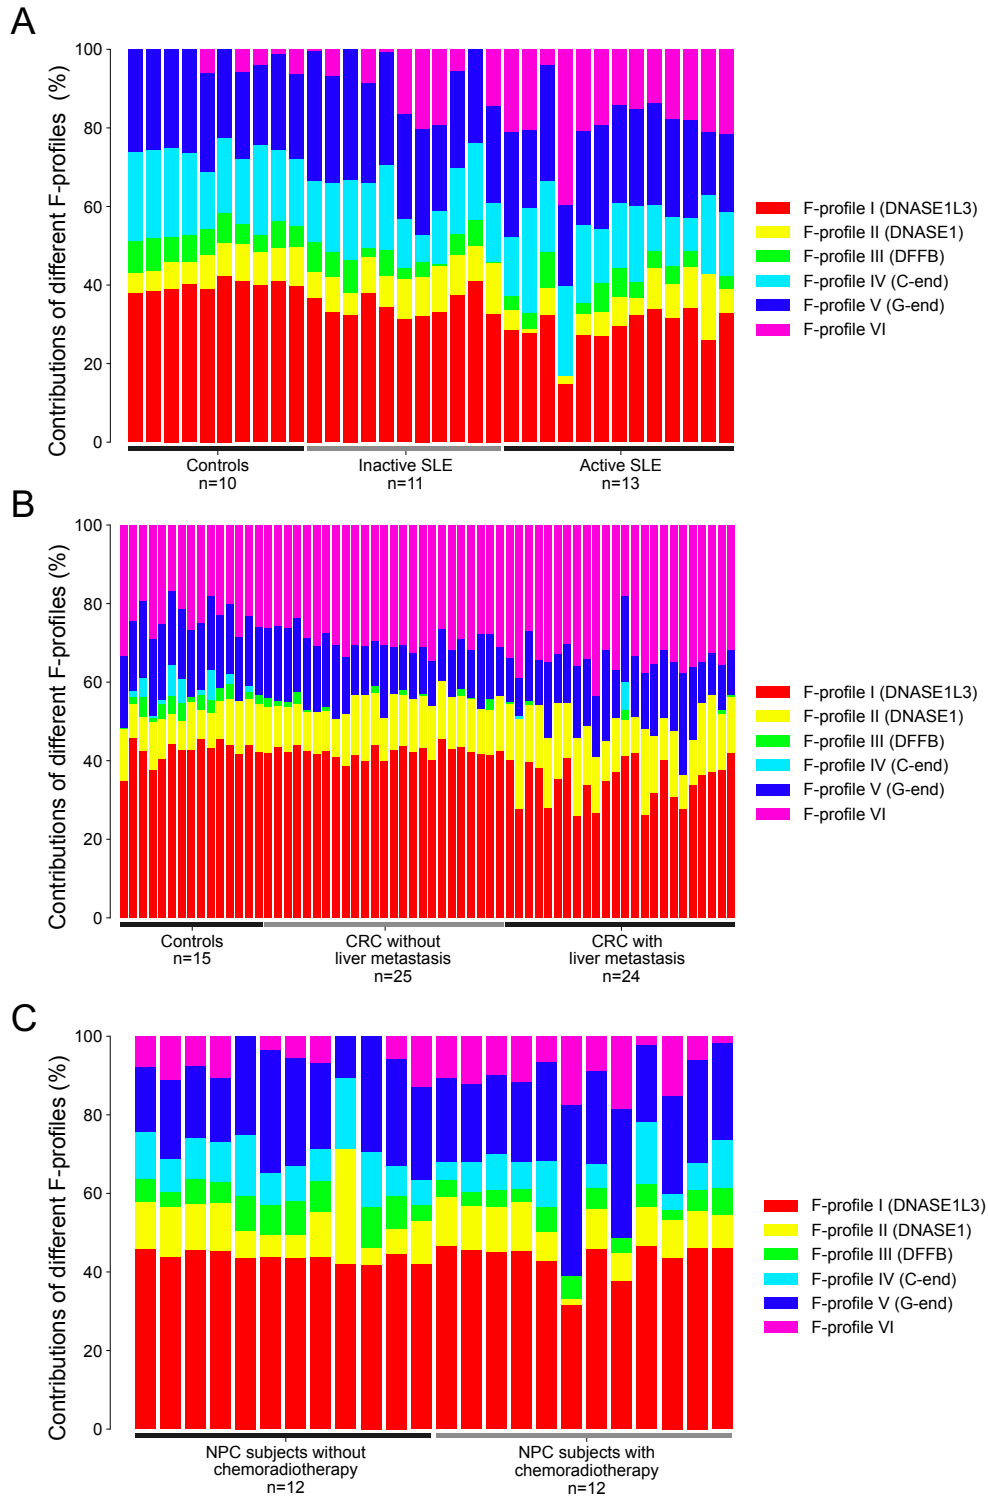

**Fig. S4.** The F-profiles levels in human diseased subjects. (A) F-profile levels in patients with and without sporadic (systemic lupus erythematosus) SLE. (B) F-profile levels in patients with and without colorectal cancer (C) F-profile levels in patients with nasopharyngeal carcinoma (NPC) in with and without chemoradiotherapy.

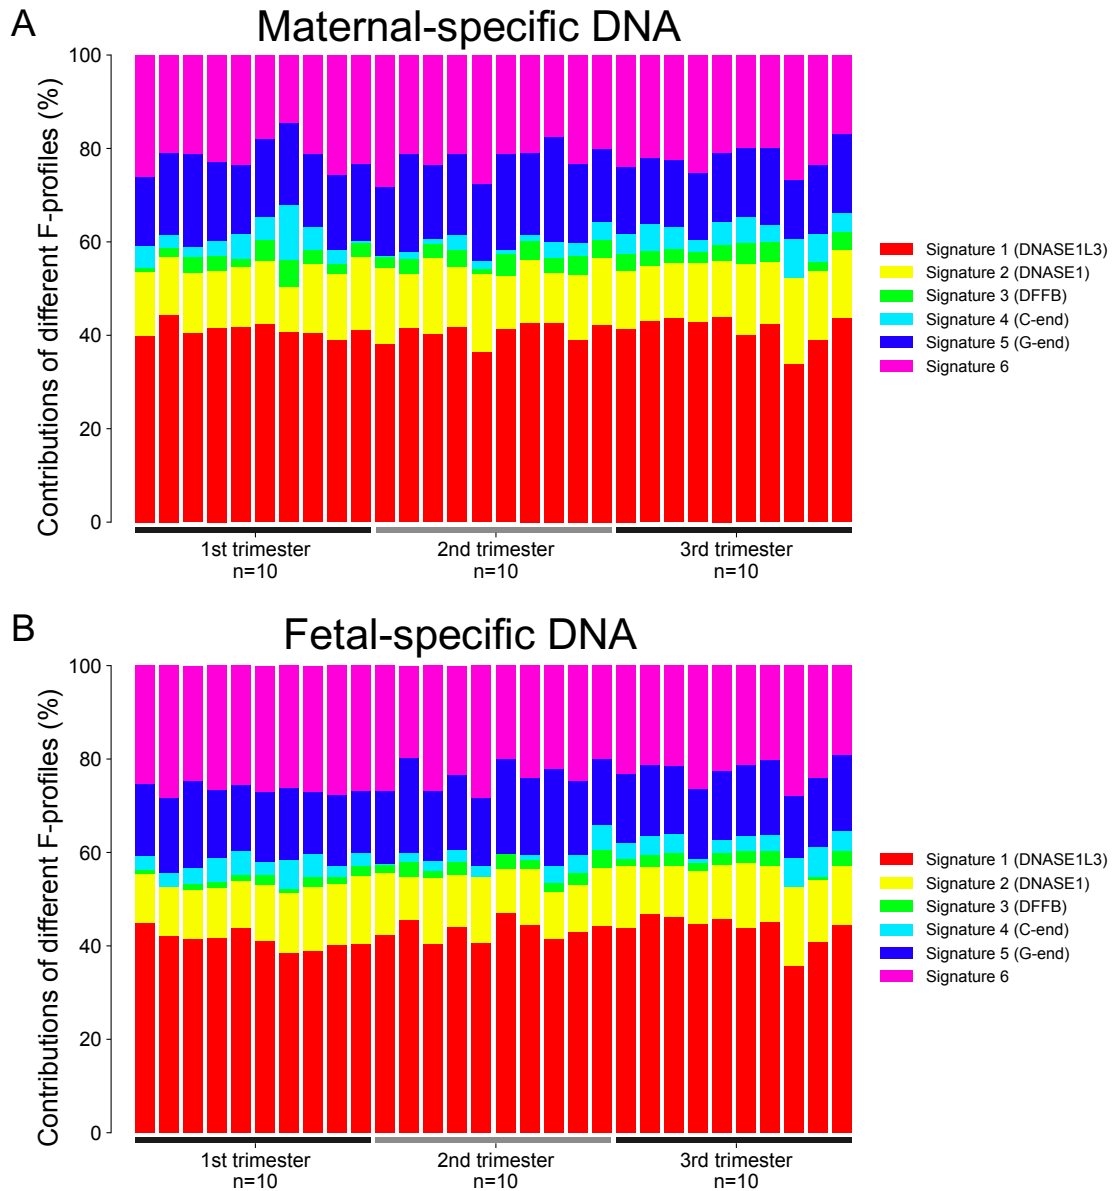

**Fig. S5.** The F-profiles levels in the (A) maternal- and (B) fetal-specific DNA in plasma cfDNA of pregnant women across first, second and third trimesters.

**Table S1.** 256 4-mer end motif frequencies of six F-profiles.

| <b>4-mer end motif</b> | F-profile I | F-profile II | F-profile III | F-profile IV | F-profile V | F-profile VI |
|------------------------|-------------|--------------|---------------|--------------|-------------|--------------|
| AAAA                   | 0.0036      | 0.0020       | 0.0000        | 0.0004       | 0.0023      | 0.0037       |
| AAAC                   | 0.0025      | 0.0010       | 0.0026        | 0.0017       | 0.0039      | 0.0038       |
| AAAG                   | 0.0042      | 0.0014       | 0.0000        | 0.0024       | 0.0044      | 0.0032       |
| AAAT                   | 0.0031      | 0.0002       | 0.0046        | 0.0000       | 0.0013      | 0.0045       |
| AACA                   | 0.0023      | 0.0023       | 0.0108        | 0.0000       | 0.0029      | 0.0045       |
| AACC                   | 0.0018      | 0.0023       | 0.0131        | 0.0013       | 0.0028      | 0.0048       |
| AACG                   | 0.0009      | 0.0021       | 0.0142        | 0.0028       | 0.0027      | 0.0048       |
| AACT                   | 0.0005      | 0.0002       | 0.0212        | 0.0000       | 0.0000      | 0.0070       |
| AAGA                   | 0.0025      | 0.0024       | 0.0000        | 0.0023       | 0.0028      | 0.0028       |
| AAGC                   | 0.0013      | 0.0019       | 0.0000        | 0.0052       | 0.0021      | 0.0032       |
| AAGG                   | 0.0023      | 0.0022       | 0.0000        | 0.0046       | 0.0032      | 0.0026       |
| AAGT                   | 0.0012      | 0.0014       | 0.0003        | 0.0013       | 0.0016      | 0.0030       |
| ATAA                   | 0.0020      | 0.0010       | 0.0047        | 0.0000       | 0.0013      | 0.0030       |
| AATC                   | 0.0003      | 0.0008       | 0.0071        | 0.0008       | 0.0020      | 0.0042       |
| AATG                   | 0.0016      | 0.0012       | 0.0036        | 0.0005       | 0.0030      | 0.0028       |
| AATT                   | 0.0005      | 0.0000       | 0.0126        | 0.0000       | 0.0000      | 0.0057       |
| ACAA                   | 0.0048      | 0.0021       | 0.0018        | 0.0000       | 0.0045      | 0.0037       |
| ACAC                   | 0.0020      | 0.0000       | 0.0035        | 0.0011       | 0.0067      | 0.0022       |
| ACAG                   | 0.0040      | 0.0015       | 0.0010        | 0.0010       | 0.0069      | 0.0030       |
| ACAT                   | 0.0032      | 0.0003       | 0.0095        | 0.0000       | 0.0037      | 0.0049       |
| ACCA                   | 0.0029      | 0.0015       | 0.0118        | 0.0000       | 0.0117      | 0.0044       |
| ACCC                   | 0.0043      | 0.0023       | 0.0205        | 0.0020       | 0.0050      | 0.0062       |
| ACCG                   | 0.0015      | 0.0023       | 0.0147        | 0.0065       | 0.0095      | 0.0044       |
| ACCT                   | 0.0032      | 0.0000       | 0.0354        | 0.0000       | 0.0017      | 0.0099       |
| ACGA                   | 0.0011      | 0.0008       | 0.0000        | 0.0034       | 0.0024      | 0.0028       |
| ACGC                   | 0.0001      | 0.0000       | 0.0015        | 0.0064       | 0.0012      | 0.0030       |
| ACGG                   | 0.0006      | 0.0004       | 0.0000        | 0.0052       | 0.0019      | 0.0027       |
| ACGT                   | 0.0006      | 0.0002       | 0.0019        | 0.0025       | 0.0025      | 0.0029       |
| ACTA                   | 0.0022      | 0.0000       | 0.0091        | 0.0000       | 0.0061      | 0.0039       |
| ACTC                   | 0.0023      | 0.0010       | 0.0142        | 0.0004       | 0.0027      | 0.0059       |
| ACTG                   | 0.0031      | 0.0007       | 0.0084        | 0.0002       | 0.0061      | 0.0041       |
| ACTT                   | 0.0017      | 0.0000       | 0.0262        | 0.0000       | 0.0000      | 0.0085       |
| AGAA                   | 0.0033      | 0.0027       | 0.0037        | 0.0013       | 0.0041      | 0.0039       |
| AGAC                   | 0.0023      | 0.0014       | 0.0033        | 0.0027       | 0.0044      | 0.0034       |
| AGAG                   | 0.0039      | 0.0015       | 0.0006        | 0.0037       | 0.0065      | 0.0028       |
| AGAT                   | 0.0025      | 0.0016       | 0.0083        | 0.0002       | 0.0032      | 0.0044       |
| AGCA                   | 0.0008      | 0.0023       | 0.0094        | 0.0024       | 0.0083      | 0.0029       |
| AGCC                   | 0.0011      | 0.0028       | 0.0137        | 0.0045       | 0.0049      | 0.0044       |

|      |        |        |        |        |        |        |
|------|--------|--------|--------|--------|--------|--------|
| AGCG | 0.0000 | 0.0027 | 0.0114 | 0.0104 | 0.0078 | 0.0026 |
| AGCT | 0.0000 | 0.0002 | 0.0243 | 0.0013 | 0.0031 | 0.0070 |
| AGGA | 0.0021 | 0.0028 | 0.0000 | 0.0040 | 0.0043 | 0.0023 |
| AGGC | 0.0010 | 0.0034 | 0.0000 | 0.0066 | 0.0045 | 0.0027 |
| AGGG | 0.0021 | 0.0031 | 0.0000 | 0.0055 | 0.0055 | 0.0019 |
| AGGT | 0.0009 | 0.0032 | 0.0004 | 0.0024 | 0.0039 | 0.0025 |
| AGTA | 0.0024 | 0.0016 | 0.0064 | 0.0000 | 0.0052 | 0.0032 |
| AGTC | 0.0013 | 0.0024 | 0.0092 | 0.0019 | 0.0054 | 0.0046 |
| AGTG | 0.0020 | 0.0023 | 0.0038 | 0.0017 | 0.0082 | 0.0023 |
| AGTT | 0.0012 | 0.0014 | 0.0186 | 0.0000 | 0.0014 | 0.0068 |
| ATAA | 0.0019 | 0.0001 | 0.0000 | 0.0005 | 0.0015 | 0.0029 |
| ATAC | 0.0006 | 0.0000 | 0.0008 | 0.0011 | 0.0023 | 0.0025 |
| ATAG | 0.0010 | 0.0000 | 0.0000 | 0.0020 | 0.0026 | 0.0023 |
| ATAT | 0.0014 | 0.0000 | 0.0028 | 0.0003 | 0.0011 | 0.0027 |
| ATCA | 0.0000 | 0.0007 | 0.0017 | 0.0012 | 0.0029 | 0.0023 |
| ATCC | 0.0000 | 0.0006 | 0.0038 | 0.0023 | 0.0019 | 0.0032 |
| ATCG | 0.0000 | 0.0005 | 0.0023 | 0.0036 | 0.0021 | 0.0020 |
| ATCT | 0.0000 | 0.0000 | 0.0101 | 0.0003 | 0.0001 | 0.0042 |
| ATGA | 0.0008 | 0.0002 | 0.0000 | 0.0018 | 0.0023 | 0.0022 |
| ATGC | 0.0000 | 0.0000 | 0.0000 | 0.0036 | 0.0018 | 0.0027 |
| ATGG | 0.0003 | 0.0001 | 0.0000 | 0.0034 | 0.0019 | 0.0021 |
| ATGT | 0.0005 | 0.0000 | 0.0003 | 0.0013 | 0.0017 | 0.0024 |
| ATTA | 0.0006 | 0.0000 | 0.0009 | 0.0003 | 0.0021 | 0.0022 |
| ATTC | 0.0002 | 0.0000 | 0.0022 | 0.0012 | 0.0009 | 0.0034 |
| ATTG | 0.0002 | 0.0000 | 0.0005 | 0.0010 | 0.0022 | 0.0021 |
| ATTT | 0.0008 | 0.0000 | 0.0058 | 0.0000 | 0.0000 | 0.0041 |
| CAAA | 0.0103 | 0.0044 | 0.0000 | 0.0031 | 0.0023 | 0.0057 |
| CAAC | 0.0073 | 0.0021 | 0.0018 | 0.0043 | 0.0041 | 0.0052 |
| CAAG | 0.0118 | 0.0023 | 0.0000 | 0.0077 | 0.0058 | 0.0051 |
| CAAT | 0.0097 | 0.0026 | 0.0019 | 0.0004 | 0.0035 | 0.0068 |
| CACA | 0.0054 | 0.0059 | 0.0090 | 0.0018 | 0.0073 | 0.0041 |
| CACC | 0.0042 | 0.0065 | 0.0132 | 0.0050 | 0.0051 | 0.0041 |
| CACG | 0.0044 | 0.0054 | 0.0132 | 0.0115 | 0.0048 | 0.0039 |
| CACT | 0.0045 | 0.0053 | 0.0191 | 0.0010 | 0.0040 | 0.0064 |
| CAGA | 0.0076 | 0.0030 | 0.0000 | 0.0060 | 0.0032 | 0.0043 |
| CAGC | 0.0043 | 0.0024 | 0.0000 | 0.0113 | 0.0016 | 0.0045 |
| CAGG | 0.0073 | 0.0027 | 0.0000 | 0.0090 | 0.0041 | 0.0039 |
| CAGT | 0.0054 | 0.0028 | 0.0000 | 0.0030 | 0.0030 | 0.0043 |
| CATA | 0.0084 | 0.0038 | 0.0037 | 0.0000 | 0.0024 | 0.0058 |
| CATC | 0.0042 | 0.0048 | 0.0086 | 0.0023 | 0.0034 | 0.0067 |
| CATG | 0.0078 | 0.0048 | 0.0031 | 0.0017 | 0.0055 | 0.0051 |
| CATT | 0.0065 | 0.0038 | 0.0132 | 0.0000 | 0.0000 | 0.0093 |



|      |        |        |        |        |        |        |
|------|--------|--------|--------|--------|--------|--------|
| CCAA | 0.0234 | 0.0000 | 0.0000 | 0.0034 | 0.0036 | 0.0049 |
| CCAC | 0.0163 | 0.0000 | 0.0008 | 0.0070 | 0.0047 | 0.0048 |
| CCAG | 0.0232 | 0.0000 | 0.0000 | 0.0075 | 0.0063 | 0.0041 |
| CCAT | 0.0194 | 0.0000 | 0.0025 | 0.0010 | 0.0046 | 0.0061 |
| CCCA | 0.0246 | 0.0024 | 0.0048 | 0.0056 | 0.0106 | 0.0051 |
| CCCC | 0.0165 | 0.0041 | 0.0102 | 0.0083 | 0.0045 | 0.0048 |
| CCCG | 0.0191 | 0.0024 | 0.0098 | 0.0260 | 0.0037 | 0.0049 |
| CCCT | 0.0212 | 0.0012 | 0.0194 | 0.0041 | 0.0023 | 0.0092 |
| CCGA | 0.0070 | 0.0003 | 0.0002 | 0.0123 | 0.0002 | 0.0045 |
| CCGC | 0.0028 | 0.0000 | 0.0001 | 0.0233 | 0.0000 | 0.0045 |
| CCGG | 0.0045 | 0.0000 | 0.0007 | 0.0173 | 0.0000 | 0.0039 |
| CCGT | 0.0046 | 0.0007 | 0.0017 | 0.0088 | 0.0011 | 0.0044 |
| CCTA | 0.0224 | 0.0004 | 0.0043 | 0.0000 | 0.0043 | 0.0068 |
| CCTC | 0.0150 | 0.0024 | 0.0098 | 0.0057 | 0.0008 | 0.0080 |
| CCTG | 0.0215 | 0.0019 | 0.0043 | 0.0055 | 0.0035 | 0.0059 |
| CCTT | 0.0179 | 0.0000 | 0.0157 | 0.0000 | 0.0000 | 0.0110 |
| CGAA | 0.0100 | 0.0131 | 0.0006 | 0.0074 | 0.0053 | 0.0031 |
| CGAC | 0.0082 | 0.0091 | 0.0006 | 0.0108 | 0.0034 | 0.0032 |
| CGAG | 0.0123 | 0.0111 | 0.0011 | 0.0156 | 0.0080 | 0.0028 |
| CGAT | 0.0099 | 0.0124 | 0.0000 | 0.0050 | 0.0070 | 0.0034 |
| CGCA | 0.0056 | 0.0164 | 0.0071 | 0.0134 | 0.0053 | 0.0017 |
| CGCC | 0.0056 | 0.0133 | 0.0078 | 0.0172 | 0.0024 | 0.0018 |
| CGCG | 0.0031 | 0.0083 | 0.0096 | 0.0276 | 0.0000 | 0.0016 |
| CGCT | 0.0059 | 0.0137 | 0.0101 | 0.0118 | 0.0023 | 0.0030 |
| CGGA | 0.0056 | 0.0101 | 0.0000 | 0.0149 | 0.0052 | 0.0029 |
| CGGC | 0.0038 | 0.0100 | 0.0000 | 0.0224 | 0.0029 | 0.0029 |
| CGGG | 0.0053 | 0.0104 | 0.0011 | 0.0174 | 0.0061 | 0.0021 |
| CGGT | 0.0037 | 0.0108 | 0.0000 | 0.0083 | 0.0052 | 0.0025 |
| CGTA | 0.0116 | 0.0150 | 0.0000 | 0.0049 | 0.0040 | 0.0039 |
| CGTC | 0.0083 | 0.0180 | 0.0035 | 0.0145 | 0.0075 | 0.0039 |
| CGTG | 0.0110 | 0.0173 | 0.0039 | 0.0119 | 0.0070 | 0.0023 |
| CGTT | 0.0104 | 0.0155 | 0.0046 | 0.0054 | 0.0028 | 0.0052 |
| CTAA | 0.0075 | 0.0000 | 0.0000 | 0.0032 | 0.0018 | 0.0060 |
| CTAC | 0.0039 | 0.0000 | 0.0006 | 0.0041 | 0.0024 | 0.0051 |
| CTAG | 0.0056 | 0.0002 | 0.0000 | 0.0071 | 0.0035 | 0.0050 |
| CTAT | 0.0058 | 0.0000 | 0.0005 | 0.0013 | 0.0017 | 0.0058 |
| CTCA | 0.0018 | 0.0037 | 0.0023 | 0.0047 | 0.0040 | 0.0048 |
| CTCC | 0.0010 | 0.0027 | 0.0034 | 0.0061 | 0.0012 | 0.0048 |
| CTCG | 0.0013 | 0.0026 | 0.0041 | 0.0121 | 0.0014 | 0.0040 |
| CTCT | 0.0017 | 0.0016 | 0.0056 | 0.0031 | 0.0009 | 0.0055 |
| CTGA | 0.0062 | 0.0006 | 0.0000 | 0.0053 | 0.0016 | 0.0043 |
| CTGC | 0.0027 | 0.0000 | 0.0000 | 0.0099 | 0.0004 | 0.0046 |

|      |        |        |        |        |        |        |
|------|--------|--------|--------|--------|--------|--------|
| CTGG | 0.0035 | 0.0003 | 0.0000 | 0.0085 | 0.0019 | 0.0039 |
| CTGT | 0.0038 | 0.0004 | 0.0001 | 0.0037 | 0.0021 | 0.0044 |
| CTTA | 0.0068 | 0.0000 | 0.0000 | 0.0020 | 0.0029 | 0.0062 |
| CTTC | 0.0032 | 0.0001 | 0.0008 | 0.0050 | 0.0005 | 0.0069 |
| CTTG | 0.0045 | 0.0002 | 0.0000 | 0.0053 | 0.0029 | 0.0051 |
| CTTT | 0.0057 | 0.0000 | 0.0020 | 0.0019 | 0.0000 | 0.0084 |
| GAAA | 0.0031 | 0.0037 | 0.0000 | 0.0019 | 0.0041 | 0.0063 |
| GAAC | 0.0000 | 0.0008 | 0.0017 | 0.0040 | 0.0092 | 0.0048 |
| GAAG | 0.0022 | 0.0013 | 0.0000 | 0.0047 | 0.0082 | 0.0044 |
| GAAT | 0.0014 | 0.0005 | 0.0034 | 0.0005 | 0.0055 | 0.0070 |
| GACA | 0.0000 | 0.0014 | 0.0108 | 0.0002 | 0.0101 | 0.0047 |
| GACC | 0.0017 | 0.0040 | 0.0131 | 0.0023 | 0.0048 | 0.0056 |
| GACG | 0.0001 | 0.0019 | 0.0139 | 0.0063 | 0.0060 | 0.0054 |
| GACT | 0.0000 | 0.0006 | 0.0226 | 0.0000 | 0.0036 | 0.0080 |
| GAGA | 0.0000 | 0.0029 | 0.0000 | 0.0038 | 0.0056 | 0.0032 |
| GAGC | 0.0000 | 0.0019 | 0.0000 | 0.0074 | 0.0035 | 0.0039 |
| GAGG | 0.0004 | 0.0024 | 0.0000 | 0.0067 | 0.0046 | 0.0034 |
| GAGT | 0.0000 | 0.0012 | 0.0001 | 0.0016 | 0.0035 | 0.0038 |
| GATA | 0.0004 | 0.0003 | 0.0052 | 0.0000 | 0.0056 | 0.0048 |
| GATC | 0.0000 | 0.0009 | 0.0085 | 0.0021 | 0.0046 | 0.0062 |
| GATG | 0.0000 | 0.0014 | 0.0034 | 0.0013 | 0.0072 | 0.0041 |
| GATT | 0.0000 | 0.0002 | 0.0170 | 0.0000 | 0.0001 | 0.0101 |
| GCAA | 0.0067 | 0.0040 | 0.0008 | 0.0002 | 0.0068 | 0.0036 |
| GCAC | 0.0040 | 0.0025 | 0.0020 | 0.0027 | 0.0088 | 0.0032 |
| GCAG | 0.0063 | 0.0033 | 0.0011 | 0.0024 | 0.0083 | 0.0029 |
| GCAT | 0.0047 | 0.0018 | 0.0053 | 0.0000 | 0.0070 | 0.0047 |
| GCCA | 0.0059 | 0.0045 | 0.0064 | 0.0023 | 0.0175 | 0.0029 |
| GCCC | 0.0068 | 0.0073 | 0.0162 | 0.0054 | 0.0081 | 0.0039 |
| GCCG | 0.0045 | 0.0063 | 0.0122 | 0.0138 | 0.0097 | 0.0023 |
| GCCT | 0.0064 | 0.0020 | 0.0263 | 0.0014 | 0.0090 | 0.0080 |
| GCGA | 0.0009 | 0.0023 | 0.0005 | 0.0067 | 0.0038 | 0.0030 |
| GCGC | 0.0000 | 0.0012 | 0.0015 | 0.0112 | 0.0019 | 0.0031 |
| GCGG | 0.0002 | 0.0018 | 0.0014 | 0.0091 | 0.0022 | 0.0026 |
| GCGT | 0.0001 | 0.0012 | 0.0007 | 0.0050 | 0.0027 | 0.0029 |
| GCTA | 0.0053 | 0.0011 | 0.0060 | 0.0000 | 0.0090 | 0.0045 |
| GCTC | 0.0047 | 0.0041 | 0.0112 | 0.0030 | 0.0035 | 0.0059 |
| GCTG | 0.0066 | 0.0030 | 0.0064 | 0.0019 | 0.0071 | 0.0039 |
| GCTT | 0.0060 | 0.0008 | 0.0227 | 0.0000 | 0.0006 | 0.0093 |
| GGAA | 0.0056 | 0.0030 | 0.0016 | 0.0030 | 0.0125 | 0.0038 |
| GGAC | 0.0023 | 0.0010 | 0.0005 | 0.0053 | 0.0146 | 0.0030 |
| GGAG | 0.0046 | 0.0004 | 0.0000 | 0.0064 | 0.0171 | 0.0025 |
| GGAT | 0.0039 | 0.0017 | 0.0044 | 0.0010 | 0.0114 | 0.0043 |

|       |        |        |        |        |        |        |
|-------|--------|--------|--------|--------|--------|--------|
| GGCA  | 0.0002 | 0.0006 | 0.0067 | 0.0033 | 0.0232 | 0.0009 |
| GGCC  | 0.0019 | 0.0050 | 0.0111 | 0.0075 | 0.0126 | 0.0033 |
| GGCG  | 0.0001 | 0.0014 | 0.0103 | 0.0153 | 0.0183 | 0.0010 |
| GGCT  | 0.0009 | 0.0003 | 0.0184 | 0.0027 | 0.0149 | 0.0049 |
| GGGA  | 0.0017 | 0.0025 | 0.0000 | 0.0057 | 0.0134 | 0.0015 |
| GGGC  | 0.0007 | 0.0035 | 0.0000 | 0.0090 | 0.0106 | 0.0023 |
| GGGG  | 0.0020 | 0.0018 | 0.0000 | 0.0050 | 0.0129 | 0.0012 |
| GGGT  | 0.0014 | 0.0034 | 0.0004 | 0.0024 | 0.0091 | 0.0021 |
| GGTA  | 0.0023 | 0.0000 | 0.0038 | 0.0000 | 0.0197 | 0.0022 |
| GGTC  | 0.0026 | 0.0045 | 0.0066 | 0.0038 | 0.0147 | 0.0050 |
| GGTG  | 0.0023 | 0.0013 | 0.0029 | 0.0024 | 0.0204 | 0.0017 |
| GGTT  | 0.0048 | 0.0026 | 0.0172 | 0.0000 | 0.0099 | 0.0075 |
| GTAA  | 0.0005 | 0.0014 | 0.0000 | 0.0013 | 0.0046 | 0.0035 |
| GTAC  | 0.0000 | 0.0000 | 0.0000 | 0.0023 | 0.0051 | 0.0032 |
| GTAG  | 0.0000 | 0.0012 | 0.0000 | 0.0034 | 0.0051 | 0.0031 |
| GTAT  | 0.0002 | 0.0000 | 0.0008 | 0.0000 | 0.0054 | 0.0039 |
| GTCA  | 0.0000 | 0.0023 | 0.0007 | 0.0025 | 0.0066 | 0.0025 |
| GTCC  | 0.0000 | 0.0035 | 0.0025 | 0.0042 | 0.0045 | 0.0036 |
| GTCG  | 0.0000 | 0.0026 | 0.0027 | 0.0063 | 0.0038 | 0.0023 |
| GTCT  | 0.0000 | 0.0003 | 0.0080 | 0.0014 | 0.0046 | 0.0047 |
| GTGA  | 0.0000 | 0.0013 | 0.0000 | 0.0033 | 0.0052 | 0.0025 |
| GTGC  | 0.0000 | 0.0012 | 0.0000 | 0.0068 | 0.0035 | 0.0032 |
| GTGG  | 0.0000 | 0.0014 | 0.0000 | 0.0049 | 0.0034 | 0.0024 |
| GTGT  | 0.0000 | 0.0003 | 0.0000 | 0.0019 | 0.0041 | 0.0023 |
| GTTA  | 0.0004 | 0.0000 | 0.0000 | 0.0004 | 0.0061 | 0.0048 |
| G TTC | 0.0001 | 0.0004 | 0.0000 | 0.0031 | 0.0032 | 0.0065 |
| GTTG  | 0.0002 | 0.0001 | 0.0000 | 0.0022 | 0.0049 | 0.0042 |
| GTTT  | 0.0016 | 0.0000 | 0.0044 | 0.0000 | 0.0018 | 0.0085 |
| TAAA  | 0.0068 | 0.0112 | 0.0000 | 0.0002 | 0.0005 | 0.0043 |
| TAAC  | 0.0047 | 0.0110 | 0.0000 | 0.0019 | 0.0029 | 0.0036 |
| TAAG  | 0.0065 | 0.0104 | 0.0000 | 0.0025 | 0.0026 | 0.0039 |
| TAAT  | 0.0072 | 0.0092 | 0.0000 | 0.0000 | 0.0018 | 0.0038 |
| TACA  | 0.0064 | 0.0138 | 0.0010 | 0.0000 | 0.0027 | 0.0032 |
| TACC  | 0.0046 | 0.0166 | 0.0022 | 0.0015 | 0.0038 | 0.0024 |
| TACG  | 0.0043 | 0.0127 | 0.0045 | 0.0036 | 0.0000 | 0.0032 |
| TACT  | 0.0059 | 0.0116 | 0.0026 | 0.0000 | 0.0009 | 0.0034 |
| TAGA  | 0.0036 | 0.0103 | 0.0000 | 0.0022 | 0.0019 | 0.0036 |
| TAGC  | 0.0018 | 0.0113 | 0.0000 | 0.0050 | 0.0023 | 0.0035 |
| TAGG  | 0.0032 | 0.0114 | 0.0000 | 0.0043 | 0.0031 | 0.0034 |
| TAGT  | 0.0034 | 0.0076 | 0.0000 | 0.0002 | 0.0012 | 0.0033 |
| TATA  | 0.0076 | 0.0094 | 0.0009 | 0.0000 | 0.0017 | 0.0028 |
| TATC  | 0.0049 | 0.0117 | 0.0000 | 0.0000 | 0.0041 | 0.0036 |

|      |        |        |        |        |        |        |
|------|--------|--------|--------|--------|--------|--------|
| TATG | 0.0064 | 0.0109 | 0.0001 | 0.0000 | 0.0034 | 0.0032 |
| TATT | 0.0069 | 0.0094 | 0.0000 | 0.0000 | 0.0010 | 0.0043 |
| TCAA | 0.0038 | 0.0057 | 0.0000 | 0.0006 | 0.0000 | 0.0034 |
| TCAC | 0.0034 | 0.0060 | 0.0000 | 0.0024 | 0.0000 | 0.0033 |
| TCAG | 0.0035 | 0.0054 | 0.0000 | 0.0018 | 0.0000 | 0.0035 |
| TCAT | 0.0049 | 0.0057 | 0.0000 | 0.0003 | 0.0000 | 0.0032 |
| TCCA | 0.0036 | 0.0099 | 0.0007 | 0.0024 | 0.0011 | 0.0026 |
| TCCC | 0.0028 | 0.0108 | 0.0028 | 0.0042 | 0.0005 | 0.0019 |
| TCCG | 0.0017 | 0.0079 | 0.0029 | 0.0068 | 0.0000 | 0.0024 |
| TCCT | 0.0043 | 0.0076 | 0.0014 | 0.0014 | 0.0000 | 0.0028 |
| TCGA | 0.0006 | 0.0025 | 0.0000 | 0.0019 | 0.0000 | 0.0029 |
| TCGC | 0.0000 | 0.0019 | 0.0000 | 0.0044 | 0.0000 | 0.0028 |
| TCGG | 0.0000 | 0.0018 | 0.0002 | 0.0034 | 0.0000 | 0.0028 |
| TCGT | 0.0004 | 0.0017 | 0.0000 | 0.0017 | 0.0000 | 0.0027 |
| TCTA | 0.0058 | 0.0060 | 0.0000 | 0.0000 | 0.0000 | 0.0030 |
| TCTC | 0.0041 | 0.0070 | 0.0000 | 0.0017 | 0.0001 | 0.0032 |
| TCTG | 0.0046 | 0.0069 | 0.0001 | 0.0014 | 0.0000 | 0.0030 |
| TCTT | 0.0056 | 0.0050 | 0.0000 | 0.0000 | 0.0000 | 0.0035 |
| TGAA | 0.0066 | 0.0137 | 0.0000 | 0.0029 | 0.0021 | 0.0037 |
| TGAC | 0.0054 | 0.0120 | 0.0000 | 0.0049 | 0.0011 | 0.0033 |
| TGAG | 0.0077 | 0.0123 | 0.0000 | 0.0065 | 0.0034 | 0.0033 |
| TGAT | 0.0068 | 0.0134 | 0.0000 | 0.0010 | 0.0034 | 0.0031 |
| TGCA | 0.0056 | 0.0175 | 0.0033 | 0.0047 | 0.0014 | 0.0019 |
| TGCC | 0.0038 | 0.0178 | 0.0042 | 0.0069 | 0.0006 | 0.0015 |
| TGCG | 0.0034 | 0.0145 | 0.0061 | 0.0100 | 0.0000 | 0.0016 |
| TGCT | 0.0055 | 0.0139 | 0.0032 | 0.0033 | 0.0000 | 0.0024 |
| TGGA | 0.0029 | 0.0118 | 0.0000 | 0.0060 | 0.0029 | 0.0031 |
| TGGC | 0.0011 | 0.0134 | 0.0000 | 0.0089 | 0.0033 | 0.0028 |
| TGGG | 0.0029 | 0.0122 | 0.0000 | 0.0072 | 0.0043 | 0.0026 |
| TGGT | 0.0018 | 0.0113 | 0.0000 | 0.0028 | 0.0028 | 0.0027 |
| TGTA | 0.0078 | 0.0131 | 0.0000 | 0.0000 | 0.0014 | 0.0031 |
| TGTC | 0.0057 | 0.0167 | 0.0000 | 0.0036 | 0.0031 | 0.0034 |
| TGTG | 0.0068 | 0.0127 | 0.0013 | 0.0020 | 0.0032 | 0.0022 |
| TGTT | 0.0080 | 0.0145 | 0.0003 | 0.0000 | 0.0013 | 0.0036 |
| TTAA | 0.0010 | 0.0007 | 0.0000 | 0.0011 | 0.0000 | 0.0035 |
| TTAC | 0.0003 | 0.0005 | 0.0000 | 0.0016 | 0.0000 | 0.0035 |
| TTAG | 0.0004 | 0.0006 | 0.0000 | 0.0021 | 0.0000 | 0.0035 |
| TTAT | 0.0012 | 0.0006 | 0.0000 | 0.0010 | 0.0000 | 0.0031 |
| TTCA | 0.0000 | 0.0038 | 0.0000 | 0.0026 | 0.0000 | 0.0026 |
| TTCC | 0.0000 | 0.0025 | 0.0000 | 0.0036 | 0.0000 | 0.0024 |
| TTCG | 0.0000 | 0.0014 | 0.0001 | 0.0032 | 0.0000 | 0.0024 |
| TTCT | 0.0000 | 0.0017 | 0.0000 | 0.0019 | 0.0000 | 0.0024 |

|      |        |        |        |        |        |        |
|------|--------|--------|--------|--------|--------|--------|
| TTGA | 0.0012 | 0.0012 | 0.0000 | 0.0005 | 0.0000 | 0.0028 |
| TTGC | 0.0000 | 0.0011 | 0.0000 | 0.0023 | 0.0000 | 0.0030 |
| TTGG | 0.0000 | 0.0010 | 0.0000 | 0.0020 | 0.0000 | 0.0028 |
| TTGT | 0.0006 | 0.0008 | 0.0000 | 0.0008 | 0.0000 | 0.0025 |
| TTTA | 0.0016 | 0.0009 | 0.0000 | 0.0010 | 0.0000 | 0.0028 |
| TTTC | 0.0004 | 0.0008 | 0.0000 | 0.0023 | 0.0000 | 0.0032 |
| TTTG | 0.0005 | 0.0007 | 0.0000 | 0.0017 | 0.0000 | 0.0026 |
| TTTT | 0.0014 | 0.0002 | 0.0000 | 0.0011 | 0.0000 | 0.0029 |

**Table S2.** Relevant clinical information available for colorectal cancer (CRC) patients.

| <b>Sample ID</b> | <b>CRC patients with/without liver metastasis</b> | <b>Stage group</b> | <b>Primary cancer site</b> | <b>Metastatic sites</b> |
|------------------|---------------------------------------------------|--------------------|----------------------------|-------------------------|
| TBR1197          | No-liver metastasis                               | I                  | Rectosigmoid junction      | /                       |
| TBR1731          | No-liver metastasis                               | I                  | Colon                      | /                       |
| TBR1782          | No-liver metastasis                               | II                 | Colon                      | /                       |
| TBR1810          | No-liver metastasis                               | NA                 | Rectum                     | /                       |
| TBR1917          | No-liver metastasis                               | II                 | Colon                      | /                       |
| TBR2026          | No-liver metastasis                               | III                | Rectum                     | /                       |
| TBR2153          | No-liver metastasis                               | III                | Colon                      | /                       |
| TBR2154          | No-liver metastasis                               | II                 | Colon                      | /                       |
| TBR289           | No-liver metastasis                               | III                | Colon                      | /                       |
| TBR783           | No-liver metastasis                               | III                | Colon                      | /                       |
| TBR798           | No-liver metastasis                               | II                 | Colon                      | /                       |
| TBR810           | No-liver metastasis                               | II                 | Colon                      | /                       |
| TBR814           | No-liver metastasis                               | III                | Rectum                     | /                       |
| TBR835           | No-liver metastasis                               | I                  | Rectum                     | /                       |
| TBR850           | No-liver metastasis                               | NA                 | Rectum                     | /                       |
| TBR851           | No-liver metastasis                               | III                | Colon                      | /                       |
| TBR859           | No-liver metastasis                               | II                 | Rectum                     | /                       |
| TBR881           | No-liver metastasis                               | III                | Colon                      | /                       |
| TBR899           | No-liver metastasis                               | I                  | Colon                      | /                       |

|         |                     |     |                       |                                              |
|---------|---------------------|-----|-----------------------|----------------------------------------------|
| TBR900  | No-liver metastasis | II  | Rectosigmoid junction | /                                            |
| TBR904  | No-liver metastasis | II  | Colon                 | /                                            |
| TBR906  | No-liver metastasis | III | Colon                 | /                                            |
| TBR913  | No-liver metastasis | NA  | Rectosigmoid junction | /                                            |
| TBR938  | No-liver metastasis | II  | Colon                 | /                                            |
| TBR941  | No-liver metastasis | III | Rectum                | /                                            |
| TBR1408 | Liver metastasis    | IV  | Colon                 | Liver                                        |
| TBR1484 | Liver metastasis    | IV  | Rectosigmoid junction | Liver                                        |
| TBR1552 | Liver metastasis    | IV  | rectosigmoid junction | Liver                                        |
| TBR1718 | Liver metastasis    | IV  | Colon                 | Liver/Lung                                   |
| TBR1730 | Liver metastasis    | IV  | Colon                 | Liver                                        |
| TBR1735 | Liver metastasis    | IV  | Colon                 | Liver/Lung/<br>Adnexal region/<br>Peritoneal |
| TBR1751 | Liver metastasis    | IV  | Colon                 | Liver                                        |
| TBR1753 | Liver metastasis    | IV  | Rectum                | Liver                                        |
| TBR1797 | Liver metastasis    | IV  | Colon                 | Liver/<br>Peritoneal                         |
| TBR1798 | Liver metastasis    | IV  | Colon                 | Liver                                        |
| TBR1910 | Liver metastasis    | IV  | Colon                 | Liver/Lung                                   |
| TBR1984 | Liver metastasis    | IV  | Rectum                | Liver/Bone/<br>Distant lymph node/Lung       |
| TBR1998 | Liver metastasis    | IV  | Colon                 | Liver/Distant lymph node                     |
| TBR2025 | Liver metastasis    | IV  | Colon                 | Liver                                        |
| TBR2092 | Liver metastasis    | IV  | Rectum                | Liver                                        |
| TBR2104 | Liver metastasis    | IV  | Colon                 | Liver                                        |
| TBR2206 | Liver metastasis    | IV  | Colon                 | Liver/Lung/<br>Distant lymph node            |
| TBR2337 | Liver metastasis    | IV  | Colon                 | Liver                                        |
| TBR2346 | Liver metastasis    | IV  | Rectum                | Liver                                        |
| TBR2364 | Liver metastasis    | IV  | Colon                 | Liver                                        |

|        |                  |    |        |                     |
|--------|------------------|----|--------|---------------------|
| TBR290 | Liver metastasis | IV | Colon  | Liver/Bone/<br>Lung |
| TBR396 | Liver metastasis | IV | Rectum | Liver               |
| TBR768 | Liver metastasis | IV | Colon  | Liver               |
| TBR773 | Liver metastasis | IV | Rectum | Liver               |



**Table S3.** Barcelona Clinic Liver Cancer (BCLC) staging information for patients with hepatocellular carcinoma (HCC).

| <b>Sample ID</b> | <b>Cancer type</b> | <b>BCLC staging system</b> |
|------------------|--------------------|----------------------------|
| TBR1015          | HCC                | A                          |
| TBR1373          | HCC                | 0                          |
| TBR1388          | HCC                | A                          |
| TBR1555          | HCC                | C                          |
| TBR1586          | HCC                | A                          |
| TBR1644          | HCC                | B                          |
| TBR1662          | HCC                | A                          |
| TBR1676          | HCC                | A                          |
| TBR1677          | HCC                | A                          |
| TBR1723          | HCC                | B                          |
| TBR1757          | HCC                | C                          |
| TBR1772          | HCC                | B                          |
| TBR1774          | HCC                | A                          |
| TBR1828          | HCC                | A                          |
| TBR1838          | HCC                | C                          |
| TBR1850          | HCC                | A                          |
| TBR1861          | HCC                | C                          |
| TBR1886          | HCC                | A                          |
| TBR1899          | HCC                | A                          |
| TBR1916          | HCC                | A                          |
| TBR1920          | HCC                | A                          |
| TBR1932          | HCC                | B                          |
| TBR2000          | HCC                | C                          |
| TBR2038          | HCC                | A                          |
| TBR2080          | HCC                | A                          |
| TBR2083          | HCC                | B                          |
| TBR846           | HCC                | B                          |
| TBR852           | HCC                | B                          |
| TBR853           | HCC                | C                          |
| TBR855           | HCC                | C                          |
| TBR858           | HCC                | B                          |
| TBR874           | HCC                | B                          |
| TBR931           | HCC                | A                          |
| TBR964           | HCC                | B                          |

**Table S4.** Stage group information for patients with nasopharyngeal carcinoma (NPC).

| <b>Sample ID</b> | <b>Cancer type</b> | <b>Stage group</b> |
|------------------|--------------------|--------------------|
| TBR2343          | NPC                | II                 |
| TBR2385          | NPC                | III                |
| TBR2406          | NPC                | IV                 |
| TBR2430          | NPC                | IV                 |
| TBR2553          | NPC                | III                |
| TBR2605          | NPC                | IV                 |
| TBR2937          | NPC                | III                |
| TBR2987          | NPC                | III                |
| TBR2995          | NPC                | III                |
| TBR3133          | NPC                | III                |
| TBR3277          | NPC                | II                 |
| TBR3295          | NPC                | I                  |
